# Supplementary material
Source: PubMed Central journal article supplement (PMC3536159)
Supplement: IAI.00605-12_zii999099944so1.pdf [file IAI.00605-12_zii999099944so1.pdf]

1                                   **GARCIA ET AL. SUPPLEMENTAL TABLE LEGENDS**

2

3   **Supplemental Table 1.** SAM output data that shows unique BioIDs whose expression  
4 was changed two-fold or more in the indicated comparison. Gene ID indicates the  
5 Stanford unique BioSequence ID. Gene Name is the available information on each  
6 gene. Score(d) is the T-statistic value. Numerator (r) is the numerator of the T-  
7 statistics. Denominator (s+s<sub>0</sub>) is the denominator of the T statistics. Fold change is the  
8 fold change from the indicated comparison group. The q-value is the lowest false  
9 discovery rate at which a gene is called significant.

10

11   **Supplemental Table 2.** Supplemental Table 2 contains all of the genes whose  
12 expression changed three-fold or more in the CP9 vs. CP9*cnf1* and/or CP9 vs.  
13 CP9Δ*hlyA*<sub>1</sub> comparisons. Gene names and fold-changes are from Supplemental Table  
14 1. Protein names and Biological Processes are from UniProt and Gene Ontology.
